# Supplementary material for: One Gene and Two Proteins: a Leaderless mRNA Supports the Translation of a Shorter Form of the Shigella VirF Regulator
Source: PubMed Central journal article supplement (PMC5101355; doi:10.1128/mbio.01860-16), 2016-11-08

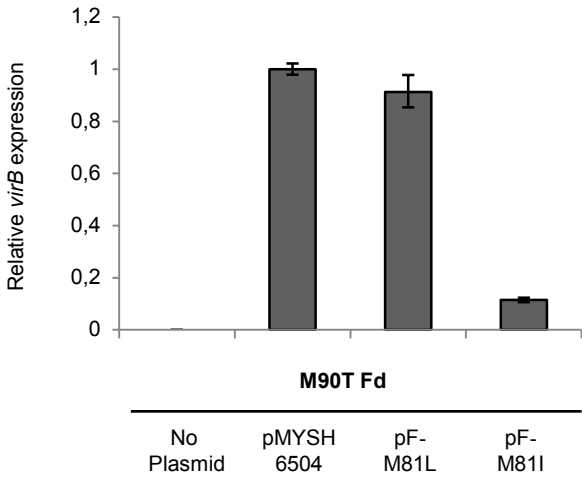

Supplement: mbo006163057sf1.pdf [file mbo006163057sf1.pdf]
