# Supplementary material for: One Gene and Two Proteins: a Leaderless mRNA Supports the Translation of a Shorter Form of the Shigella VirF Regulator
Source: PubMed Central journal article supplement (PMC5101355; doi:10.1128/mbio.01860-16), 2016-11-08
Supplement: mbo006163057sf2.pdf [file mbo006163057sf2.pdf]

No plasmid

pMYSH6504

pF-M81L

pF-FS

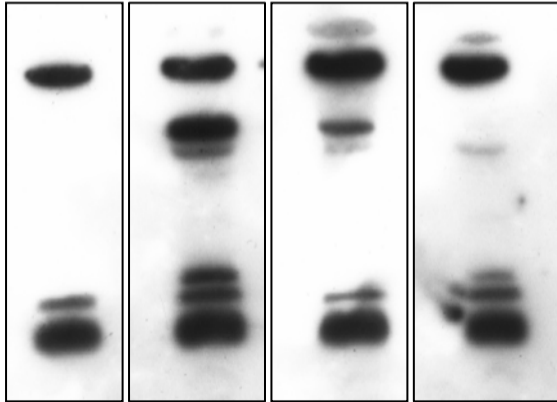

\*

VirF<sub>30</sub>

VirF<sub>21</sub>

\*

\*
