# Supplementary material for: One Gene and Two Proteins: a Leaderless mRNA Supports the Translation of a Shorter Form of the Shigella VirF Regulator
Source: PubMed Central journal article supplement (PMC5101355; doi:10.1128/mbio.01860-16), 2016-11-08
Supplement: mbo006163057sf3.pdf [file mbo006163057sf3.pdf]

p<0,01

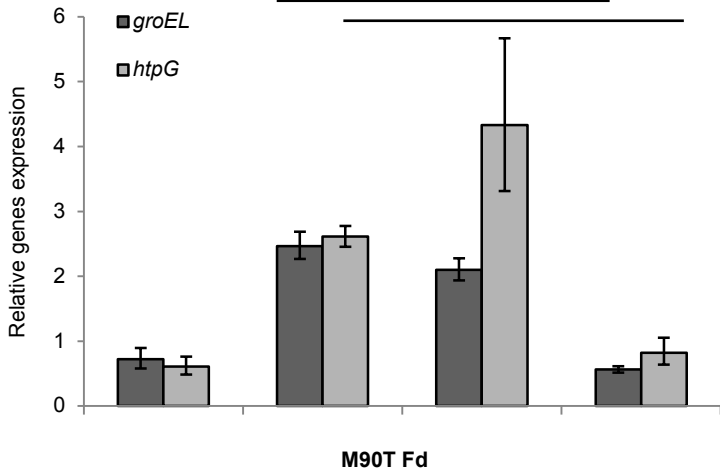

VirF<sub>30</sub>

-

+

+

-

VirF<sub>21</sub>

-

+

-

+
