# Supplementary material for: One Gene and Two Proteins: a Leaderless mRNA Supports the Translation of a Shorter Form of the Shigella VirF Regulator
Source: PubMed Central journal article supplement (PMC5101355; doi:10.1128/mbio.01860-16), 2016-11-08
Supplement: mbo006163057sf4.pdf [file mbo006163057sf4.pdf]

-      +

T7 - virF<sub>21</sub> PCR

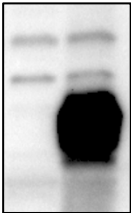

\*

\*

VirF<sub>21</sub>
