# Supplementary material for: One Gene and Two Proteins: a Leaderless mRNA Supports the Translation of a Shorter Form of the Shigella VirF Regulator
Source: PubMed Central journal article supplement (PMC5101355; doi:10.1128/mbio.01860-16), 2016-11-08
Supplement: mbo006163057st1.pdf [file mbo006163057st1.pdf]

**Table S1.** Oligodeoxyribonucleotides used in this study

| Name                | Sequence (5'- 3')                                                                             | Used for                                                                          |
|---------------------|-----------------------------------------------------------------------------------------------|-----------------------------------------------------------------------------------|
| ML-296              | ATATAGTTTGGTTATTCTGTTGAATTTATGATGGATGG<br>GGGACATAAAAAACAAAATAGAT                             | SDM <sup>a</sup>                                                                  |
| ML-297              | ATCTATTTTGTTTTTATGTCCCCATCCATCATAAATTC<br>AACAGAATAACCAAATATAT                                | SDM                                                                               |
| ML-394              | CCTTGACAGAAATTTATTATTAAGCATTATTAGAATAC<br>TGGAACCAATTTATTCATTTCA                              | SDM                                                                               |
| ML-395              | TGAAATGAATAAATTGGTTCAGTATTCTAATAATGCT<br>TAATAATAAATTTCTGTCAAGG                               | SDM                                                                               |
| ML-397              | CCTTGACAGAAATTTATTATTAAGCATTATTAGAATAA<br>TCGAACCAATTTATTCATTTCA                              | SDM                                                                               |
| ML-398              | TGAAATGAATAAATTGGTTCGATTATTCTAATAATGCT<br>TAATAATAAATTTCTGTCAAGG                              | SDM                                                                               |
| ML-331              | AAGGGCAAATTGCTTTTATAGAGGCGAAATATACAAA<br>TAAACGTCTC                                           | SDM                                                                               |
| ML-332              | GAGACGTTTATTGTATATTTTCGCTCTATAAAAGCAA<br>TTTGCCCTT                                            | SDM <sup>a</sup>                                                                  |
| ML-1344             | TGAATAAATTGGTTCATTATTCTAATAACGCTTAATAATAA<br>ATTTCTGTCAAGGCTTA                                | SDM <sup>a</sup>                                                                  |
| ML-1345             | TAAGCCTTGACAGAAATTTATTATTAAGCGTTATTAGAATAA<br>TGGAACCAATTTATTTCA                              | SDM                                                                               |
| virBQF              | CCAAGTTCTCGGATGCTATGC                                                                         | qRT-PCR                                                                           |
| virBQR              | CTCTTGATGCCAGAAAAGTAGCAA                                                                      | qRT-PCR                                                                           |
| icsAQF              | TGATGGACTTTCTCCCTTGGG                                                                         | qRT-PCR                                                                           |
| icsAQR              | TACCACGCATCCATTCCATCT                                                                         | qRT-PCR                                                                           |
| groELQF             | TCTGTGGCTGGCCTGATGA                                                                           | qRT-PCR                                                                           |
| groELQR             | TTTTTCGGCAGGTCGGTAAC                                                                          | qRT-PCR                                                                           |
| htpGQF              | CAACCGCGTTGAAGGTAAGC                                                                          | qRT-PCR                                                                           |
| htpGQR              | GACGGGATGTACAGCAGGCT                                                                          | qRT-PCR                                                                           |
| lacZQF              | CCCATCTACACCAACGTGACC                                                                         | qRT-PCR                                                                           |
| lacZQR              | AACAAACGGCGGATGACC                                                                            | qRT-PCR                                                                           |
| mdhQF               | CCTGGTACAGCAAGTTGCG                                                                           | qRT-PCR                                                                           |
| mdhQR               | CGTAGGCACATTCGACAACG                                                                          | qRT-PCR                                                                           |
| ML-512              | TCAACAATCTTCTTATCTGATC                                                                        | Primer Extension                                                                  |
| ML-1314             | TTAACCCCTTTTCTCTC                                                                             | Primer Extension                                                                  |
| ML-U25              | GTTTCATTGCCTGAGCTA                                                                            | Toeprinting                                                                       |
| ML-U26              | CAAATCGATAGAAACCTC                                                                            | Toeprinting                                                                       |
| GN20                | TACGGATCCATCTTAATAACGGAAAG                                                                    | Northern                                                                          |
| FsinR               | GGGATCCCCATCTGGC                                                                              | Northern                                                                          |
| ML-333              | NNNGGATCCATGGGACATAAAAAACAAAATAG                                                              | <i>virF</i> <sub>30</sub> pAC-30<br>cloning                                       |
| ML-335              | NNNGGATCCATGGAACCAATTTATTCATTTTC                                                              | <i>virF</i> <sub>21</sub> pAC-21<br>cloning                                       |
| ML-336              | NNNGGATCCGAAAACCCATCTGGCAA                                                                    | <i>virF</i> <sub>30</sub> pAC30 and<br><i>virF</i> <sub>21</sub> pAC21<br>cloning |
| ML-438              | NNNGGATCCTTAATACGACTCACTATAGACAGAAATT<br>TCTTAGTACTCT                                         | T7- <i>virF</i> <sub>30</sub> pAC-30-<br>FT cloning                               |
| ML-566              | TTACTATTTATCGTCGTCATCTTTGTAGTCAAATTTTT<br>ATGATATAAGTAAAATTTCA                                | T7- <i>virF</i> <sub>30</sub> pAC-30-<br>FT cloning                               |
| ML-U6 <sup>b</sup>  | <u>TCGACTTAATACGACTCACTATAGGGTCCATTACTGATGAGT</u><br><u>CCGTGAGGACGAAACGGTACTCGGTACCGTCCG</u> | T7-HH pAC-T7-HH<br>cloning                                                        |
| ML-U13 <sup>b</sup> | <u>GATCCGACGGTACCGAGTACCGTTTCGTCCTCACGGACTCAT</u><br><u>CAGTAATGGACCCTATAGTGAGTCGTATTAAG</u>  | T7-HH pAC-T7-HH<br>cloning                                                        |
| ML-U7               | NNNGGTACCGTCTAATGGAACCAATTTATTCATTTTC                                                         | <i>virF</i> +309-FT pAC-<br>T7-HH-21-FT<br>cloning                                |

|           |                                               |                                                                       |
|-----------|-----------------------------------------------|-----------------------------------------------------------------------|
| ML-U8     | NNNGGATCCCAGTCATAGCCGAATAGCCT                 | <i>virF</i> +309-FT pAC-T7-HH-21-FT cloning                           |
| FustradFL | TTAGGATCCATATCCATCATAAATTC                    | <i>virF</i> pFL-4A fusion cloning                                     |
| FustradFS | ATAGGATCCATAAATTCAACAGAATA                    | <i>virF</i> pFL-1A fusion cloning                                     |
| ML-496    | CTGGATCCTCCGCTTCCTTTAGCAGC                    | <i>virF-lacZ</i> fusion cloning                                       |
| ML-330    | NNNGGATCCATAGAAACCTCCTCCTCAGA                 | <i>virF-lacZ</i> fusion cloning                                       |
| ML-334    | NNNGGATCCATGACGGTTAGCTCAGGCAATG               | Transcriptional <i>virF-lacZ</i> fusion cloning                       |
| ML-1342   | NNNGGATCCGAATAATGGAACCAATTTATTC               | Transcriptional <i>virF-lacZ</i> fusion cloning                       |
| ML-1343   | NNNGATCCGAGCGAAATATACAAATAAACG                | Transcriptional <i>virF-lacZ</i> fusion cloning                       |
| bx5       | GGAGCTCTCACATCAG                              | <i>virB-lacZ</i> p <sub>virB</sub> -lacZ fusion cloning               |
| bx6       | GTCGTTGCACAAATCC                              | <i>virB-lacZ</i> p <sub>virB</sub> -lacZ fusion cloning               |
| ML-U1     | GAAATTAATACGACTCACTATAGACAGAAATTTCTTAGTTACT   | <i>virF</i> R1 mRNA template for <i>in vitro</i> transcription        |
| ML-U20    | TAATACGACTCACTATAGGG                          | <i>virF</i> R2 mRNA template for <i>in vitro</i> transcription        |
| ML-982    | NNNGGATCCTGAGGGGATCTTGAAGTTCC                 | <i>virF</i> R1 and R2 mRNA template for <i>in vitro</i> transcription |
| QH7-      | TAGGGATCCAAGCGAACCTTTATATC                    | <i>virF-lacZ</i> p <i>virF-lacZ</i> cloning                           |
| ML-U3     | GAAATTAATACGACTCACTATAGGGAGATTATAAGCCTTGACAGA | VirF <sub>21</sub> PCR template for <i>in vitro</i> translation       |
| ML-U28    | GGGATCCCCATCTGGC                              | VirF <sub>21</sub> PCR template for <i>in vitro</i> translation       |
| ML-U30    | GGTTATAGTCCCTTTCAGTGCA                        | DNase I footprinting                                                  |
| ML-U29    | CAAGCGAACCTTTATATC                            | DNase I footprinting                                                  |

<sup>a</sup>SDM: Site Directed Mutagenesis

<sup>b</sup>The underlined nucleotides specify the hammerhead sequence used for mRNA cleavage
