# Supplementary material for: One Gene and Two Proteins: a Leaderless mRNA Supports the Translation of a Shorter Form of the Shigella VirF Regulator
Source: PubMed Central journal article supplement (PMC5101355; doi:10.1128/mbio.01860-16), 2016-11-08
Supplement: mbo006163057st2.pdf [file mbo006163057st2.pdf]

**Table S2.** Strains used in this study

| Strain      | Description                                                                                                       | Source/Reference |
|-------------|-------------------------------------------------------------------------------------------------------------------|------------------|
| M90T        | <i>S. flexneri</i> 5a                                                                                             | (1)              |
| M90T Fd     | M90T <i>virF</i>                                                                                                  | (2)              |
| M90T F-3xFT | M90T <i>virF</i> -3xFT                                                                                            | (2)              |
| DH10b       | <i>E. coli</i> K12                                                                                                | (3)              |
| P90C        | <i>E. coli</i>                                                                                                    | (4)              |
| P90C λB     | P90C derivative strain harboring a chromosomally located copy of a <i>virB-lacZ</i> fusion                        | This study       |
| P90CλA      | P90C derivative strain harboring a chromosomally located copy of an <i>icsA-lacZ</i> fusion; renamed from ULS1127 | (5)              |
| BL21 (DE3)  | <i>E. coli</i> strain for protein expression                                                                      | (6)              |

## REFERENCES

1. **Sansonetti PJ, d’Hauteville H, Formal SB, Toucas M.** Plasmid-mediated invasiveness of “*Shigella*-like” *Escherichia coli*. *Ann Microbiol (Paris)* **133**:351–5.
2. **Leuzzi A, Di Martino ML, Campilongo R, Falconi M, Barbagallo M, Marcocci L, Pietrangeli P, Casalino M, Grossi M, Micheli G, Colonna B, Prosseda G.** 2015. Multifactor Regulation of the MdtJI Polyamine Transporter in *Shigella*. *PLoS One* **10**:e0136744.
3. **Durfee T, Nelson R, Baldwin S, Plunkett G, Burland V, Mau B, Petrosino JF, Qin X, Muzny DM, Ayele M, Gibbs RA, Csörge B, Pósfai G, Weinstock GM, Blattner FR.** 2008. The complete genome sequence of *Escherichia coli* DH10B: insights into the biology of a laboratory workhorse. *J Bacteriol* **190**:2597–606.
4. **Sasakawa C, Komatsu K, Tobe T, Suzuki T, Yoshikawa M.** 1993. Eight genes in region 5 that form an operon are essential for invasion of epithelial cells by *Shigella flexneri* 2a. *J Bacteriol* **175**:2334–46.
5. **Giangrossi M, Prosseda G, Tran CN, Brandi A, Colonna B, Falconi M.** 2010. A novel antisense RNA regulates at transcriptional level the virulence gene *icsA* of *Shigella flexneri*. *Nucleic Acids Res* **38**:3362–75.
6. **Jeong H, Barbe V, Lee CH, Vallenet D, Yu DS, Choi S-H, Couloux A, Lee S-W, Yoon SH, Cattolico L, Hur C-G, Park H-S, Ségurens B, Kim SC, Oh TK, Lenski RE, Studier FW, Daegelen P, Kim JF.** 2009. Genome sequences of *Escherichia coli* B strains REL606 and BL21(DE3). *J Mol Biol* **394**:644–52.
