# Supplementary material for: One Gene and Two Proteins: a Leaderless mRNA Supports the Translation of a Shorter Form of the Shigella VirF Regulator
Source: PubMed Central journal article supplement (PMC5101355; doi:10.1128/mbio.01860-16), 2016-11-08
Supplement: mbo006163057st3.pdf [file mbo006163057st3.pdf]

**Table S3.** Plasmids used in this study

| Plasmid name            | Description                                                                                                                                  | Source/<br>Reference |
|-------------------------|----------------------------------------------------------------------------------------------------------------------------------------------|----------------------|
| pMYSH6504               | pBR322 derivative carrying <i>S. flexneri</i> <i>virF</i> gene                                                                               | (1)                  |
| pF-M4G                  | pMYSH6504 derivative with ATG to GGG mutation at positions 71-73 in <i>virF</i> (primer pairs used: ML-296 /ML-297)                          | This study           |
| pF-M81L                 | pMYSH6504 derivative with ATG to CTG mutation at positions 311-313 in <i>virF</i> (ML-394/ML-395)                                            | This study           |
| pF-M81I                 | pMYSH6504 derivative with ATG to ATC mutation at positions 311-313 in <i>virF</i> (ML-397/ML-398)                                            | This study           |
| pF-FS                   | pMYSH6504 derivative with insertion G after position 208 in <i>virF</i> (ML-331/ML-332)                                                      | This study           |
| p <sub>virB</sub> -lacZ | <i>virB-lacZ</i> transcriptional fusion in pRS415 (bx5/bx6)                                                                                  | This study           |
| pFL-1A                  | <i>virF-lacZ</i> translational fusion, <i>virF</i> (-289 to +64), from Met1 in frame with the CDS of <i>lacZ</i> (ML-496/ML- FustradFS)      | This study           |
| pFL-4A                  | <i>virF-lacZ</i> translational fusion, <i>virF</i> (-289 to +73) from Met4 in frame with the CDS of <i>lacZ</i> (ML-496/ML- FustradFL)       | This study           |
| pFL-M4G                 | pFL-4A with mutations ATG to GGG at positions 71-73) in <i>virF</i> (ML- ML-296 /ML-297)                                                     | This study           |
| pVirF-lacZ              | <i>virF(wt)-lacZ</i> translational fusion in pRS414 (pos: -289 to +104) (ML-496/Qh7)                                                         | This study           |
| pRS-6504                | <i>virF(wt)-lacZ</i> translational fusion in pRS414 (pos: -289 to +405) (ML-496/ML-330)                                                      | This study           |
| pRS-M81L                | <i>virF(M81L)-lacZ</i> translational fusion in pRS414 (ML-496/ML-330)                                                                        | This study           |
| pRS-M4G                 | <i>virF(M4G)-lacZ</i> translational fusion in pRS414 (ML-496/ML-330)                                                                         | This study           |
| pRS-FS                  | <i>virF(FS)-lacZ</i> translational fusion in pRS414 (ML-496/ML-330)                                                                          | This study           |
| pAC-30                  | pGIP7 derivative carrying <i>virF</i> <sub>30</sub> M81L ORF (ML-333/ML-336)                                                                 | This study           |
| pAC-21                  | pGIP7 derivative carrying <i>virF</i> <sub>21</sub> ORF (ML-335/ML-336)                                                                      | This study           |
| pRS-F(+70)              | <i>virF-lacZ</i> transcriptional fusion in pRS415 (pos: +70 to +405) (ML-333/ML-330)                                                         | This study           |
| pRS-F(+145)             | As pRS-F(+70) but from +145 to +405 (ML-334/ML-330)                                                                                          | This study           |
| pRS-F(+205)             | As pRS-F(+70) but from +205 to +405) (ML-1343/ML-330)                                                                                        | This study           |
| pRS-F(+305)             | As pRS-F(+70) but from +305 to +405) (ML-1342/ML-330)                                                                                        | This study           |
| pRS-F(+205 -10mut)      | pRS-F(+205) derivative with mutations CATTAT to CGTTAT at position +298 to +303 in <i>virF</i> (ML-1344/ML-1345)                             | This study           |
| pAC-T730-FT             | pACYC184 derivative carrying <i>virF</i> sequence (+1) under the control of a T7 promoter (ML-438/ML-566)                                    | This study           |
| pAC-T7-HH               | pACYC184 derivative with a T7 promoter and a specific hammerhead ribozyme for <i>virF</i> (ML-U6/ML-U13)                                     | This study           |
| pAC-T7-HH-FT            | pACYC184 derivative carrying <i>virF</i> sequence (+309) preceded by a T7 promoter and a specific hammerhead ribozyme sequence (ML-U7/ML-U8) | This study           |
| pGIP7                   | pACYC184 derivative carrying <i>lacI</i> gene and <i>P<sub>lac</sub></i>                                                                     | (2)                  |
| pACYC184                | Medium copy number cloning vector                                                                                                            | (3)                  |
| pRS415                  | LacZ transcriptional fusion vector                                                                                                           | (4)                  |
| pRS414                  | LacZ translational fusion vector                                                                                                             | (4)                  |

## REFERENCES

1. Sakai T, Sasakawa C, Makino S, Kamata K, Yoshikawa M. 1986. Molecular cloning of a genetic determinant for Congo red binding ability which is essential for the virulence of *Shigella flexneri*. Infect Immun **51**:476–82.
2. Falconi M, Prosseda G, Giangrossi M, Beghetto E, Colonna B. 2001. Involvement of FIS in the H-NS-mediated regulation of *virF* gene of *Shigella* and enteroinvasive *Escherichia coli*. Mol Microbiol **42**:439–52.

3. **Chang AC, Cohen SN.** 1978. Construction and characterization of amplifiable multicopy DNA cloning vehicles derived from the P15A cryptic miniplasmid. *J Bacteriol* **134**:1141–56.
4. **Simons RW, Houtman F, Kleckner N.** 1987. Improved single and multicopy lac-based cloning vectors for protein and operon fusions. *Gene* **53**:85–96.
